# Supplementary material for: Transcatheter Versus Surgical Aortic Valve Replacement in Patients with Cardiac Surgery: Meta-Analysis and Systematic Review of the Literature
Source: PubMed Central journal article supplement (PMC7570107; doi:10.3390/jcdd7030036), 2020-09-10
Supplement: jcdd-07-00036-s001.pdf [file jcdd-07-00036-s001.pdf]

# Transcatheter Versus Surgical Aortic Valve Replacement in Patients with Cardiac Surgery: Meta-Analysis and Systematic Review of the Literature

**Azka Latif**<sup>1,\*</sup>, Noman Lateef<sup>1</sup>, Muhammad Junaid Ahsan<sup>1</sup>, Vikas Kapoor<sup>1</sup>, Rana Mohammad Usman<sup>2</sup>, Stephen Cooper<sup>1</sup>, Venkata Andukuri<sup>1</sup>, Mohsin Mirza<sup>1</sup>, Muhammad Zubair Ashfaq<sup>1</sup> and Rami Khouzam<sup>3</sup>

- <sup>1</sup> Department of Internal Medicine, Creighton University, Omaha, NE 68124, USA; noman.mlateef@gmail.com (N.L.); junaidahsan333@gmail.com (M.J.A.); VikasKapoor@creighton.edu (V.K.); StephenCooper@creighton.edu (S.C.); VenkataAndukuri@creighton.edu (V.A.); Muhammad.Ashfaq@alegent.org (M.Z.A.); mohsin.mirza@creighton.edu (M.M.)  
<sup>2</sup> Department of Internal Medicine, University of Tennessee, Memphis, TN 38152, USA; rusman@uthsc.edu  
<sup>3</sup> Department of Cardiology, University of Tennessee, Memphis, TN 38152, USA; khouzamrami@yahoo.com  
 \* Correspondence: azkalatif@creighton.edu; Tel.: +402-651-4961

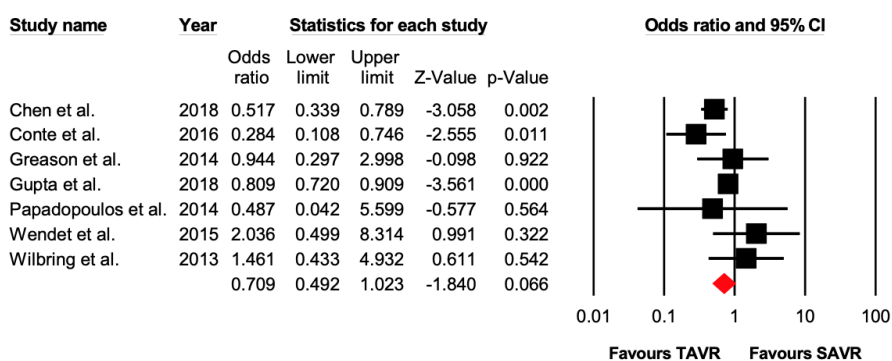

**Supplementary Figure 1:** Forest Plot showing comparing the risk of acute kidney injury between transcatheter versus surgical aortic valve replacement.

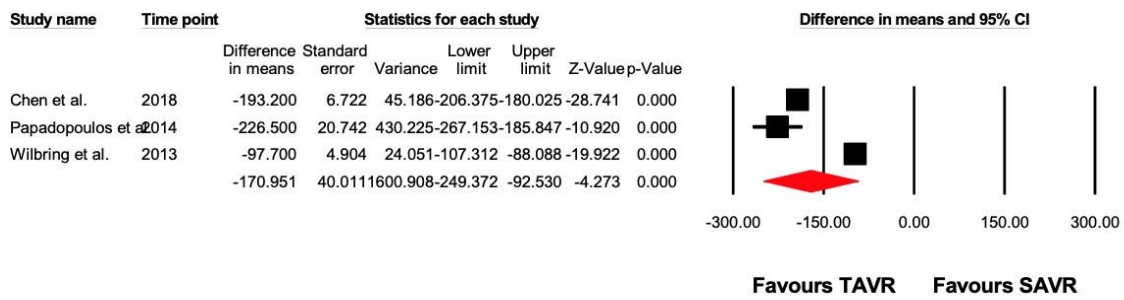

**Supplementary Figure 2:** Forest Plot showing comparing the procedural time between transcatheter versus surgical aortic valve replacement.

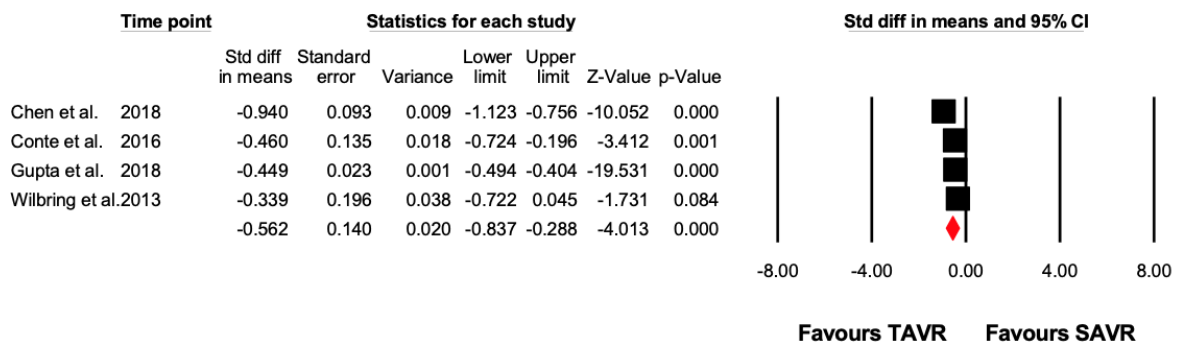

**Supplementary Figure 3:** Forest Plot showing comparing the length of hospital stay between transcatheter versus surgical aortic valve replacement.
